# Supplementary material for: The utility of the Mayo Score for predicting the yield of genetic testing in patients with hypertrophic cardiomyopathy
Source: PubMed Central journal article supplement — Arch Med Sci. 2018 Oct 8;15(3):641–9. doi: 10.5114/aoms.2018.78767 (PMC6524174; doi:10.5114/aoms.2018.78767), 2018-10-08
Supplement: AMS-15-33903-S1.pdf [file AMS-15-33903-S1.pdf]

**Supplemental Table S1.** Complete list of mutated genes, sorted alphabetically, all ACMG class variants, marked from class 3 (VUS) to 5 (pathogenic).

| Gene            | Full name                                                           | Nucleotide change, protein variant | Patients (n) | ACMG class | ClinVar (n)                                                    |
|-----------------|---------------------------------------------------------------------|------------------------------------|--------------|------------|----------------------------------------------------------------|
| <b>ABCG5</b>    | <i>ATP-binding cassette, sub-family G, member 5</i>                 | ABCG5 p.Arg198Gln                  | 1            |            | Uncertain significance (3)                                     |
| <b>ACTC1</b>    | <i>actin, alpha, cardiac muscle 1</i>                               | ACTC1 c.76G>A p.(Asp26Asn)         | 1            | 3          |                                                                |
| <b>ACTN2</b>    | <i>actinin, alpha 2</i>                                             | ACTN2 c.1193G>T p.(Arg398Leu)      | 1            | 3          |                                                                |
|                 |                                                                     | ACTN2 c.1549C>T p.(Leu517Phe)      | 2            | 3          |                                                                |
|                 |                                                                     | ACTN2 c.1552C>T p.(His518Tyr)      | 1            | 3          |                                                                |
|                 |                                                                     | ACTN2 c.1822C>T, p.(Arg608Trp)     | 1            | 3          |                                                                |
|                 |                                                                     | ACTN2 c.2147C>T, p.(Thr716Met)     | 1            | 3          |                                                                |
|                 |                                                                     | ACTN2 p.Arg93Gln                   | 1            |            | Uncertain significance (3)                                     |
|                 |                                                                     | ACTN2 p.His518Tyr                  | 1            |            | Uncertain significance (1)                                     |
| <b>ANKRD1</b>   | <i>ankyrin repeat domain 1 (cardiac muscle)</i>                     | ANKRD1 p.Ala276Val                 | 1            |            | Benign(5); Likely benign(5); Uncertain significance(1)         |
| <b>BAG3</b>     | <i>BCL2-associated athanogene 3</i>                                 | BAG3 c.1523A>G p.(Tyr508Cys)       | 1            | 3          |                                                                |
| <b>CACNA1C</b>  | <i>calcium channel, voltage-dependent, L type, alpha 1C subunit</i> | CACNA1C c.5693+2T>A                | 1            | 3          |                                                                |
|                 |                                                                     | CACNA1C c.5893T>C, p.(Ser1965Pro)  | 1            |            |                                                                |
|                 |                                                                     | CACNA1C p.Arg518His                | 1            |            | Likely pathogenic(1); Pathogenic(1); Uncertain significance(1) |
| <b>CACNA2D1</b> | <i>calcium channel, voltage-dependent, alpha 2/delta subunit 1</i>  | CACNA2D1 p.Ser709Asn               | 2            |            |                                                                |
| <b>CAV3</b>     | <i>caveolin 3</i>                                                   | CAV3 c.233C>T, p.(Thr78Met)        | 1            |            |                                                                |
|                 |                                                                     | CAV3 c.89A>G p.(Lys30Arg)          | 1            | 3          |                                                                |
| <b>COL5A2</b>   | <i>collagen, type V, alpha 2</i>                                    | COL5A2 p.Pro1359Leu                | 1            |            |                                                                |
|                 |                                                                     | COL5A2 p.Val95Asp                  | 1            |            |                                                                |
| <b>COX15</b>    | <i>COX15 homolog, cytochrome c oxidase assembly protein (yeast)</i> | COX15 p.Arg406Gln                  | 1            |            |                                                                |
| <b>CRYAB</b>    | <i>crystallin, alpha B</i>                                          | CRYAB c.116C>T p.(Pro39Leu)        | 1            | 3          |                                                                |
|                 |                                                                     | CRYAB p.Pro51Leu                   | 1            |            | Likely benign(7); Uncertain significance(1)                    |
| <b>CSRP3</b>    | <i>cysteine and glycine-rich protein 3 (cardiac LIM protein)</i>    | CSRP3 c.208G>T p.(Gly70Trp)        | 4            | 3          |                                                                |
|                 |                                                                     | CSRP3 c.208G>T, p.(Gly70Trp) HOM   | 1            | 3          |                                                                |

|                |                                          |                                    |   |   |                                                            |
|----------------|------------------------------------------|------------------------------------|---|---|------------------------------------------------------------|
|                |                                          | CSRP3 c.520A>G, p.(Lys174Glu)      | 1 | 3 |                                                            |
|                |                                          | CSRP3 p.Gly70Trp HOM               | 1 |   |                                                            |
| <b>DES</b>     | <i>desmin</i>                            | DES c.728A>G, p.(His243Arg)        | 1 | 3 |                                                            |
| <b>DMD</b>     | <i>dystrophin</i>                        | DMD c.10262+1G>A                   | 1 |   | Benign(1); Uncertain significance(3)                       |
|                |                                          | DMD c.1934A>G, p.(Asp645Gly)       | 1 | 3 |                                                            |
|                |                                          | DMD p.Ile99Val                     | 1 |   | Likely benign(1); Uncertain significance(4)                |
| <b>DSC2</b>    | <i>desmocollin 2</i>                     | DSC2 c.1223C>T p.(Thr408Ile)       | 1 | 3 |                                                            |
|                |                                          | DSC2 c.1661A>G p.(Gln554Arg)       | 1 | 3 |                                                            |
| <b>DSG2</b>    | <i>desmoglein 2</i>                      | DSG2 c.166G>A, p.(Val56Met)        | 2 |   | Likely benign(5); Pathogenic(1); Uncertain significance(4) |
|                |                                          | DSG2 c.216G>T, p.(Lys72Asn)        | 1 | 3 |                                                            |
| <b>DSP</b>     | <i>desmoplakin</i>                       | DSP c.242G>A p.(Cys81Tyr)          | 1 | 3 |                                                            |
|                |                                          | DSP c.2684A>G, p.(Tyr895Cys)       | 1 | 3 | Uncertain significance (5)                                 |
|                |                                          | DSP c.3550C>T p.(Arg1184Trp)       | 1 |   |                                                            |
|                |                                          | DSP c.3616T>A p.(Leu1206Ile)       | 1 | 3 |                                                            |
|                |                                          | DSP c.4961T>C, p.(Leu1654Pro)      | 1 | 3 |                                                            |
|                |                                          | DSP c.688G>A, p.(Asp230Asn)        | 1 |   |                                                            |
|                |                                          | DSP c.8068C>A p.(Pro2690Thr)       | 1 | 3 |                                                            |
|                |                                          | DSP c.8467C>G p.(Pro2823Ala)       | 1 | 3 |                                                            |
|                |                                          | DSP p.Thr2665Met                   | 1 |   | Uncertain significance (1)                                 |
| <b>DTNA</b>    | <i>dystrobrevin, alpha</i>               | DTNA p. p.Thr205Met                | 1 |   |                                                            |
|                |                                          | DTNA p.Gln106Glu                   | 1 |   | Uncertain significance (2)                                 |
| <b>ELN</b>     | <i>elastin</i>                           | ELN c.1408C>T p.(Gln470*)          | 1 | 4 |                                                            |
| <b>EMILIN1</b> | <i>elastin microfibril interfacier 1</i> | EMILIN1 p.Leu606ValfsTer43 (delCT) | 1 |   |                                                            |
| <b>FHL2</b>    | <i>four and a half LIM domains 2</i>     | FHL2 c.191C>A, p.(Ala64Asp)        | 1 | 3 |                                                            |
|                |                                          | FHL2 c.467A>T p.(Lys156Ile)        | 1 | 3 |                                                            |
|                |                                          | FHL2 c.501+1G>T                    | 1 | 3 |                                                            |
|                |                                          | FHL2 p.Leu21Gln                    | 1 |   | Uncertain significance (1)                                 |
| <b>FKTN</b>    | <i>fukutin</i>                           | FKTN c.166-4A>G                    | 1 |   | Benign(1);Uncertain significance(6)                        |

|              |                                                                                |                                |   |   |                                                      |
|--------------|--------------------------------------------------------------------------------|--------------------------------|---|---|------------------------------------------------------|
| <b>FLNA</b>  | <i>filamin A</i>                                                               | FLNA p.Arg1532Gln              | 1 |   |                                                      |
|              |                                                                                | FLNA p.Leu1540Val              | 1 |   |                                                      |
|              |                                                                                | FLNA p.Lys1538Thr              | 1 |   |                                                      |
| <b>FLNC</b>  | <i>filamin C</i>                                                               | FLNC c.4564C>A p.(Gln1522Lys)  | 1 | 3 |                                                      |
|              |                                                                                | FLNC c.4660A>C p.(Ile1554Leu)  | 1 | 3 |                                                      |
| <b>GLA</b>   | <i>galactosidase, alpha</i>                                                    | GLA c.644A>G p.(Asn215Ser)     | 1 | 5 |                                                      |
|              |                                                                                | GLA c.902G>A p.(Arg301Gln)     | 1 | 5 |                                                      |
|              |                                                                                | GLA c.937G>T p.(Asp313Tyr)     | 1 |   |                                                      |
| <b>GPD1L</b> | <i>glycerol-3-phosphate dehydrogenase 1-like</i>                               | GPD1L c.370A>G, p.(Ile124Val)  | 1 |   |                                                      |
|              |                                                                                | GPD1L c.370A>G, p.(Ile124Val)  | 1 |   |                                                      |
| <b>HCN4</b>  | <i>hyperpolarization activated cyclic nucleotide-gated potassium channel 4</i> | HCN4 p.Glu1193Gln              | 1 |   | Benign(1);Likely benign(2);Uncertain significance(1) |
| <b>IRX4</b>  | <i>Iroquois Homeobox Protein 4</i>                                             | IRX4 c.375C>G p.(Tyr125*)      | 1 | 3 |                                                      |
| <b>JAG1</b>  | <i>jagged 1 (Alagille syndrome)</i>                                            | JAG1 p.Thr962Ala               | 1 |   |                                                      |
| <b>JUP</b>   | <i>junction plakoglobin</i>                                                    | JUP p.Ser24Leu                 | 1 |   | Uncertain significance (1)                           |
| <b>KCNA5</b> | <i>potassium voltage-gated channel, shaker-related subfamily, member 5</i>     | KCNA5 c.633G>C, p.(Glu211Asp)  | 1 |   |                                                      |
|              |                                                                                | KCNA5 p.Thr374Ile              | 1 |   |                                                      |
| <b>KCNH2</b> | <i>potassium voltage-gated channel, subfamily H, member 2</i>                  | KCNH2 c.3107G>A p.(Gly1036Asp) | 1 | 3 |                                                      |
|              |                                                                                | KCNH2 c.526C>T p.Arg176Trp     | 1 |   | Likely benign(1);Uncertain significance(5)           |
| <b>KCNJ2</b> | <i>potassium inwardly-rectifying channel, subfamily J, member 2</i>            | KCNJ5 p.Met210Ile              | 1 |   | Likely benign (1)                                    |
| <b>KCNQ1</b> | <i>potassium voltage-gated channel, KQT-like subfamily, member 1</i>           | KCNQ1 p.Gly269Ser              | 1 |   | Pathogenic (4) for long QT syndrome                  |
| <b>LAMA4</b> | <i>laminin, alpha 4</i>                                                        | LAMA4 p.Arg730Cys              | 1 |   |                                                      |
|              |                                                                                | LAMA4 p.Ile36Thr               | 1 |   |                                                      |
| <b>LDB3</b>  | <i>LIM domain binding 3</i>                                                    | LDB3 c.1838C>T, p.(Pro613Leu)  | 1 | 3 |                                                      |
|              |                                                                                | LDB3 p.Ala222Thr               | 1 |   |                                                      |
|              |                                                                                | LDB3 p.Gly508Cys               | 1 |   |                                                      |
|              |                                                                                | LDB3 p.Gly653Arg               | 1 |   |                                                      |
| <b>LMNA</b>  | <i>lamin A/C</i>                                                               | LMNA c.1930C>T p.(Arg644Cys)   | 1 |   |                                                      |
| <b>MIB1</b>  | <i>mindbomb homolog 1</i>                                                      | MIB1 c.1111C>T p.(Arg371*)     | 1 | 3 |                                                      |

|               |                                          |                                              |   |   |                                   |
|---------------|------------------------------------------|----------------------------------------------|---|---|-----------------------------------|
|               |                                          | MIB1 c.1971del p.(Asn658Thrfs*7)             | 1 | 3 |                                   |
|               |                                          | MIB1 c.908+2T>A                              | 1 | 3 |                                   |
| <b>MYBPC3</b> | <i>myosin binding protein C, cardiac</i> | MYBPC3 c.1000G>A p.(Glu334Lys)               | 1 | 3 |                                   |
|               |                                          | MYBPC3 c.1028delC p.(Thr343MetfsTer7)        | 2 | 5 |                                   |
|               |                                          | MYBPC3 c.1078A>T p.(Lys360Ter)               | 1 | 5 |                                   |
|               |                                          | MYBPC3 c.1468G>A p.(Gly490Arg)               | 3 | 3 |                                   |
|               |                                          | MYBPC3 c.1484G>A, p.(Arg495Gln)              | 1 | 4 | Pathogenic/Likely pathogenic (12) |
|               |                                          | MYBPC3 c.1558G>T p.(Glu520*)                 | 2 | 5 |                                   |
|               |                                          | MYBPC3 c.1577_1580dup, p.(Cys528Thrfs*4)     | 1 | 5 |                                   |
|               |                                          | MYBPC3 c.1736A>C p.(Lys579Thr)               | 1 | 3 |                                   |
|               |                                          | MYBPC3 c.1790G>A p.(Arg597Gln)               | 1 | 3 |                                   |
|               |                                          | MYBPC3 c.1855G>A p.(Glu619Lys)               | 1 |   |                                   |
|               |                                          | MYBPC3 c.185dup p.(Arg63Thrfs*50)            | 1 | 5 |                                   |
|               |                                          | MYBPC3 c.1897+1G>A                           | 1 | 5 | Pathogenic (4)                    |
|               |                                          | MYBPC3 c.2215G>T p.(Glu739*)                 | 1 | 5 |                                   |
|               |                                          | MYBPC3 c.2309-3C>G                           | 1 |   |                                   |
|               |                                          | MYBPC3 c.2381C>T, p.(Pro794Leu)              | 1 | 3 |                                   |
|               |                                          | MYBPC3 c.2382delG p.(Pro795LeufsTer27)       | 1 | 5 |                                   |
|               |                                          | MYBPC3 c.2429G>A p.(Arg810His)               | 1 | 3 |                                   |
|               |                                          | MYBPC3 c.2540_2547delinsT p.(Tyr847Leufs*30) | 1 | 5 |                                   |
|               |                                          | MYBPC3 c.2639_2642dup, p.(Ser882Argfs*3)     | 2 | 5 |                                   |
|               |                                          | MYBPC3 c.2686G>A, p.(Val896Met)              | 2 |   |                                   |
|               |                                          | MYBPC3 c.2687T>G, p.(Val896Gly)              | 1 | 3 |                                   |
|               |                                          | MYBPC3 c.2815C>T p.(Arg939Trp)               | 1 | 3 |                                   |
|               |                                          | MYBPC3 c.3097C>T p.(Arg1033Trp)              | 1 | 3 |                                   |
|               |                                          | MYBPC3 c.3130C>T p.(Gln1044*)                | 1 | 5 |                                   |
|               |                                          | MYBPC3 c.3166dup p.(Ala1056Glyfs*9)          | 1 | 5 |                                   |
|               |                                          | MYBPC3 c.3190+5G>A                           | 1 | 5 | Pathogenic/Likely pathogenic (9)  |

|             |                                                     |                                      |    |   |                                   |
|-------------|-----------------------------------------------------|--------------------------------------|----|---|-----------------------------------|
|             |                                                     | MYBPC3 c.3343G>A, p.(Val1115Ile)     | 1  | 3 |                                   |
|             |                                                     | MYBPC3 c.3392T>C, p.(Ile1131Thr)     | 1  |   |                                   |
|             |                                                     | MYBPC3 c.3413G>C, p.(Arg1138Pro)     | 1  | 3 |                                   |
|             |                                                     | MYBPC3 c.3490+1G>T                   | 3  | 5 | Pathogenic (2)                    |
|             |                                                     | MYBPC3 c.3580dup p.(Ala1194Glyfs*14) | 1  | 5 |                                   |
|             |                                                     | MYBPC3 c.3697C>T, p.(Gln1233*)       | 10 | 5 |                                   |
|             |                                                     | MYBPC3 c.373_374del, p.(Ala125*)     | 1  | 5 |                                   |
|             |                                                     | MYBPC3 c.3767_3769del p.(Thr1256del) | 1  | 4 |                                   |
|             |                                                     | MYBPC3 c.3811C>T p.(Arg1271*)        | 1  | 4 |                                   |
|             |                                                     | MYBPC3 c.442G>A p.(Gly148Arg)        | 1  | 3 |                                   |
|             |                                                     | MYBPC3 c.565G>A p.(Val189Ile)        | 1  |   |                                   |
|             |                                                     | MYBPC3 c.62T>G p.(Val21Gly)          | 1  | 3 |                                   |
|             |                                                     | MYBPC3 c.696del, p.(Phe233Serfs*67)  | 1  | 5 |                                   |
|             |                                                     | MYBPC3 c.724T>C, p.(Ser242Pro)       | 1  | 3 |                                   |
|             |                                                     | MYBPC3 c.772+1G>A                    | 7  | 5 | Pathogenic/Likely pathogenic (4)  |
|             |                                                     | MYBPC3 c.842G>A p.(Arg281Gln)        | 1  |   |                                   |
|             |                                                     | MYBPC3 c.977G>A, p.(Arg326Gln)       | 9  |   |                                   |
| <b>MYH6</b> | <i>myosin, heavy chain 6, cardiac muscle, alpha</i> | MYH6 c.3010G>T, p.(Ala1004Ser)       | 1  |   |                                   |
|             |                                                     | MYH6 c.3346C>A p.(Arg1116Ser)        | 1  | 3 |                                   |
|             |                                                     | MYH6 c.3469G>A, p.(Gly1157Arg)       | 1  | 3 |                                   |
|             |                                                     | MYH6 c.3607dup p.(Ala1203Glyfs*30)   | 1  | 3 |                                   |
|             |                                                     | MYH6 c.3902C>T p.(Ser1301Leu)        | 1  | 3 |                                   |
|             |                                                     | MYH6 p.Gln1534His                    | 1  |   | Uncertain significance (1)        |
| <b>MYH7</b> | <i>myosin, heavy chain 7, cardiac muscle, beta</i>  | MYH7 c.1063G>A, p.(Ala355Thr)        | 1  | 4 |                                   |
|             |                                                     | MYH7 c.1207C>T, p.(Arg403Trp)        | 1  | 5 |                                   |
|             |                                                     | MYH7 c.1436A>G, p.(Asn479Ser)        | 1  | 4 |                                   |
|             |                                                     | MYH7 c.161G>A p.(Arg54Gln)           | 1  | 3 |                                   |
|             |                                                     | MYH7 c.1816G>A p.(Val606Met)         | 1  | 5 | Pathogenic/Likely pathogenic (11) |
|             |                                                     | MYH7 c.1868A>G p.(Asn623Ser)         | 1  | 3 |                                   |
|             |                                                     | MYH7 c.1979C>A, p.(Thr660Asn)        | 1  | 3 |                                   |

|              |                                                                   |                                    |   |   |                                                |
|--------------|-------------------------------------------------------------------|------------------------------------|---|---|------------------------------------------------|
|              |                                                                   | MYH7 c.2039C>T p.(Ser680Phe)       | 1 | 3 |                                                |
|              |                                                                   | MYH7 c.2051T>C p.(Met684Thr)       | 1 | 3 |                                                |
|              |                                                                   | MYH7 c.2081G>A, p.(Arg694His)      | 1 | 3 |                                                |
|              |                                                                   | MYH7 c.2167C>G p.(Arg723Gly)       | 1 | 5 |                                                |
|              |                                                                   | MYH7 c.2207T>C p.(Ile736Thr)       | 1 | 5 | Pathogenic (9)                                 |
|              |                                                                   | MYH7 c.2221G>A, p.(Gly741Arg)      | 1 | 4 | Pathogenic (8)                                 |
|              |                                                                   | MYH7 c.2221G>T p.(Gly741Trp)       | 1 | 4 | Pathogenic (8)                                 |
|              |                                                                   | MYH7 c.2333A>T p.(Asp778Val)       | 1 | 4 |                                                |
|              |                                                                   | MYH7 c.2347C>T, p.(Arg783Cys)      | 1 | 3 |                                                |
|              |                                                                   | MYH7 c.2389G>A p.(Ala797Thr)       | 1 | 5 | Pathogenic/Likely pathogenic (12)              |
|              |                                                                   | MYH7 c.2546T>C p.(Met849Thr)       | 1 | 4 |                                                |
|              |                                                                   | MYH7 c.2609G>A p.(Arg870His)       | 1 | 3 |                                                |
|              |                                                                   | MYH7 c.2770G>A p.(Glu924Lys)       | 1 | 5 |                                                |
|              |                                                                   | MYH7 c.2882T>G, p.(Leu961Arg)      | 2 | 3 |                                                |
|              |                                                                   | MYH7 c.3286G>T, p.(Asp1096Tyr)     | 1 | 3 |                                                |
|              |                                                                   | MYH7 c.4283T>C p.(Leu1428Ser)      | 1 | 3 |                                                |
|              |                                                                   | MYH7 c.428G>A p.(Arg143Gln)        | 2 | 4 |                                                |
|              |                                                                   | MYH7 c.4472C>G, p.(Ser1491Cys)     | 1 |   |                                                |
|              |                                                                   | MYH7 c.4487A>C p.(Glu1496Ala)      | 1 | 3 |                                                |
|              |                                                                   | MYH7 c.497T>G p.(Leu166Glu)        | 1 | 3 |                                                |
|              |                                                                   | MYH7 c.5527A>G p.(Ser1843Gly)      | 1 | 3 |                                                |
|              |                                                                   | MYH7 c.5561C>T, p.(Thr1854Met)     | 1 | 3 |                                                |
| <b>MYL2</b>  | <i>myosin, light chain 2, regulatory, cardiac, slow</i>           | MYL2 c.401A>C p.(Glu134Ala)        | 1 | 3 | Likely pathogenic(3);Uncertain significance(5) |
|              |                                                                   | MYL2 c.431C>A, p.(Pro144His)       | 1 | 3 |                                                |
|              |                                                                   | MYL2 c.496G>A p.(Asp166Asn)        | 1 | 3 |                                                |
| <b>MYL3</b>  | <i>myosin, light chain 3, alkali; ventricular, skeletal, slow</i> | MYL3 c.170C>G, p.(Ala57Gly)        | 1 | 4 |                                                |
|              |                                                                   | MYL3 c.460C>T, p.(Arg154Cys)       | 1 | 4 |                                                |
| <b>MYOM1</b> | <i>myomesin 1</i>                                                 | MYOM1 c.1175-2A>T                  | 1 | 3 |                                                |
|              |                                                                   | MYOM1 c.1230del p.(Lys410Asnfs*13) | 1 | 3 |                                                |
|              |                                                                   | MYOM1 c.1482T>G p.(Ser494Arg)      | 1 | 3 |                                                |

|               |                                                                     |                                  |   |   |                                                             |
|---------------|---------------------------------------------------------------------|----------------------------------|---|---|-------------------------------------------------------------|
|               |                                                                     | MYOM1 c.4222G>A, p.(Asp1408Asn)  | 1 |   |                                                             |
|               |                                                                     | MYOM1 c.920G>C p.(Arg307Pro)     | 1 | 3 |                                                             |
| <b>MYOZ2</b>  | <i>myozenin 2</i>                                                   | MYOZ2 c.343C>T, p.(Arg115*)      | 1 | 3 |                                                             |
| <b>MYPN</b>   | <i>myopalladin</i>                                                  | MYPN c.1012C>T p.(Arg338Cys)     | 1 | 3 |                                                             |
|               |                                                                     | MYPN c.3205C>A p.(Arg1069Ser)    | 1 | 3 |                                                             |
| <b>NEBL</b>   | <i>nebulette</i>                                                    | NEBL c.267C>G p.(Tyr89Ter)       | 1 | 3 |                                                             |
|               |                                                                     | NEBL c.614A>G p.(Asn205Ser)      | 1 | 3 |                                                             |
| <b>NEXN</b>   | <i>nexilin (F actin binding protein)</i>                            | NEXN c.1190G>A, p.(Arg397Gln)    | 1 | 3 |                                                             |
| <b>NKX2-5</b> | <i>NK2 transcription factor related, locus 5</i>                    | NKX2-5 p.Ala119Ser het confirmed | 1 |   | Benign(1);Likely benign(2);Pathogenic(1) for hypothyroidism |
|               |                                                                     | NKX2-5 c.355G>T p.(Ala119Ser)    | 1 |   |                                                             |
| <b>PKP2</b>   | <i>plakophilin 2</i>                                                | PKP2 c.1170+4_1170+7dup          | 1 | 3 |                                                             |
|               |                                                                     | PKP2 c.2552C>T, p.(Thr851Met)    | 1 | 3 |                                                             |
|               |                                                                     | PKP2 p.Val587Ile                 | 1 |   | Benign(3);Likely benign(5);Uncertain significance(2)        |
| <b>PRDM16</b> | <i>PR domain containing 16</i>                                      | PRDM16 c.1484C>T p.(Pro495Leu)   | 1 | 3 |                                                             |
|               |                                                                     | PRDM16 p.Asp418Asn               | 1 |   |                                                             |
|               |                                                                     | PRDM16 p.Phe729Leu               | 1 |   | Likely benign (1)                                           |
| <b>PRKAG2</b> | <i>protein kinase, AMP-activated, gamma 2 non-catalytic subunit</i> | PRKAG2 c.997T>G p.(Ser333Ala)    | 1 | 3 |                                                             |
|               |                                                                     | PRKAG2 p.Asn512Ile               | 1 |   | Uncertain significance (1)                                  |
|               |                                                                     | PRKAG2 p.Leu341Ser               | 1 |   |                                                             |
| <b>PTPN11</b> | <i>protein tyrosine phosphatase, non-receptor type 11</i>           | PTPN11 c.1492C>T, (p.Arg498Trp)  | 1 | 5 | Pathogenic (5)                                              |
|               |                                                                     | PTPN11 c.1643C>G p.(Ser548Cys)   | 1 | 3 |                                                             |
| <b>RAF1</b>   | <i>v-raf-1 murine leukemia viral oncogene homolog 1</i>             | RAF1 c.781C>T, p.(Pro621Ser)     | 3 | 5 |                                                             |
|               |                                                                     | RAF1 c.935T>C p.(Val312Ala)      | 1 |   |                                                             |
| <b>RBM20</b>  | <i>RNA binding motif protein 20</i>                                 | RBM20 p.Ala818Ser                | 1 |   | Likely benign(2);Uncertain significance(1)                  |
| <b>RYR2</b>   | <i>ryanodine receptor 2 (cardiac)</i>                               | RYR2 c.10640C>T p.(Thr3547Met)   | 1 | 3 |                                                             |
|               |                                                                     | RYR2 c.5654G>A p.(Gly1885Glu)    | 1 |   |                                                             |
|               |                                                                     | RYR2 p.Arg3904Trp                | 1 |   | Uncertain significance (1)                                  |

|               |                                                             |                                  |   |   |                                                                                 |
|---------------|-------------------------------------------------------------|----------------------------------|---|---|---------------------------------------------------------------------------------|
|               |                                                             | RYR2 p.Pro3209Leu                | 1 |   |                                                                                 |
| <b>SCN10A</b> | <i>Sodium Channel, Voltage Gated, Type 10 Alpha Subunit</i> | SCN10A c.3803G>A, p.(Arg1268Gln) | 1 | 3 |                                                                                 |
| <b>SCN2B</b>  | <i>sodium channel, voltage-gated, type II, beta</i>         | SCN2B c.332C>T, p.(Ser111Leu)    | 1 | 3 |                                                                                 |
|               |                                                             | SCN2B c.53G>A p.Ser18Asn         | 1 | 3 |                                                                                 |
| <b>SCN5A</b>  | <i>sodium channel, voltage-gated, type V, alpha subunit</i> | SCN5A c.1199G>A p.(Gly400Glu)    | 1 |   |                                                                                 |
|               |                                                             | SCN5A c.1673A>G, p.(His558Arg)   | 3 |   |                                                                                 |
|               |                                                             | SCN5A c.4895G>A p.(Arg1632His)   | 1 | 4 |                                                                                 |
|               |                                                             | SCN5A c.5216G>A p.(Arg1739Gln)   | 1 | 3 |                                                                                 |
|               |                                                             | SCN5A c.615T>A p.(Tyr205Ter)     | 1 | 3 |                                                                                 |
|               |                                                             | SCN5A p.Arg569Trp                | 1 |   |                                                                                 |
|               |                                                             | SCN5A p.Glu1876Val               | 1 |   |                                                                                 |
|               |                                                             | SCN5A p.His558Arg                | 1 |   |                                                                                 |
|               |                                                             | SCN5A p.Pro1044Leu               | 1 |   |                                                                                 |
| <b>SNTA1</b>  | <i>syntrophin, alpha 1</i>                                  | SNTA1 p.Ala257Gly                | 1 |   | Likely benign(4);Uncertain significance(1); Pathogenic (1) for long QT syndrome |
| <b>SOS2</b>   | <i>SOS Ras/Rho guanine nucleotide exchange factor 2</i>     | SOS1 c.233T>G, p.(Phe78Cys)      | 1 | 3 |                                                                                 |
| <b>TBX3</b>   | <i>T-box 3</i>                                              | TBX3 p.Asp114Asn                 | 1 |   |                                                                                 |
| <b>TGFB3</b>  | <i>transforming growth factor, beta 3</i>                   | TGFB3 c.293C>T, p.(Ser98Leu)     | 1 |   |                                                                                 |
|               |                                                             | TGFB3 c.487C>T p.(Arg163Trp)     | 2 | 3 |                                                                                 |
|               |                                                             | TGFB3 p.Arg163Trp                | 1 |   | Uncertain significance (3)                                                      |
| <b>TMEM43</b> | <i>transmembrane protein 43</i>                             | TMEM43 p.Arg240Cys               | 1 |   | Uncertain significance (4)                                                      |
|               |                                                             | TMPO p.Ile530SerfsTer8           | 1 | 3 |                                                                                 |
| <b>TNNC1</b>  | <i>troponin C type 1 (slow)</i>                             | TNNC1 c.435C>A p.(Asp145Glu)     | 2 | 3 |                                                                                 |
| <b>TNNI3</b>  | <i>troponin I type 3 (cardiac)</i>                          | TNNI3 c.497C>T, p.(Ser166Phe)    | 1 | 4 | Likely pathogenic(2); Pathogenic(1); Uncertain significance(1)                  |
| <b>TNNT2</b>  | <i>troponin T type 2 (cardiac)</i>                          | TNNT2 c.304C>T p.(Arg102Trp)     | 1 | 5 |                                                                                 |
|               |                                                             | TNNT2 c.311G>A p.(Arg104His)     | 1 | 5 |                                                                                 |
|               |                                                             | TNNT2 c.275G>A, p.(Gly92Glu)     | 1 | 4 |                                                                                 |
|               |                                                             | TNNT2 c.304C>T p.(Arg102Trp)     | 2 | 4 |                                                                                 |



|               |                                       |                                                |   |   |                                                |
|---------------|---------------------------------------|------------------------------------------------|---|---|------------------------------------------------|
|               |                                       | TNNT2 c.824G>A p.(Arg275Gln)                   | 1 | 3 |                                                |
|               |                                       | TNNT2 c.862C>T, p.(Arg285Cys)                  | 1 | 3 |                                                |
| <b>TPM1</b>   | <i>tropomyosin 1 (alpha)</i>          | TPM1 c.523G>A, p.(Asp175Asn)                   | 1 | 4 | Pathogenic (9)                                 |
| <b>TRIM63</b> | <i>tripartite motif-containing 63</i> | TRIM63 c.481_482delAG p.(Ser161Cysfs*8)<br>HOM | 1 | 3 |                                                |
|               |                                       | TRIM63 c.831+2T>G                              | 1 | 3 |                                                |
|               |                                       | TRIM63 p.Gln247Ter                             | 1 | 3 | Likely pathogenic(1);Uncertain significance(1) |
| <b>TXNRD2</b> | <i>thioredoxin reductase 2</i>        | TXNRD2 c.528 + 2T>C                            | 1 | 3 |                                                |
| <b>VCL</b>    | <i>vinculin</i>                       | VCL p.Arg759Gln                                | 1 | 3 | Uncertain significance (1)                     |

\*ACMG - American College of Medical Genetics and Genomics, VUS - variant of uncertain significance
