# Supplementary material for: The utility of the Mayo Score for predicting the yield of genetic testing in patients with hypertrophic cardiomyopathy
Source: PubMed Central journal article supplement — Arch Med Sci. 2018 Oct 8;15(3):641–9. doi: 10.5114/aoms.2018.78767 (PMC6524174; doi:10.5114/aoms.2018.78767), 2018-10-08
Supplement: AMS-15-33903-S2.pdf [file AMS-15-33903-S2.pdf]

**Supplemental Table SII.** Complete list of all evaluated genes.

| <b>Gene</b> | <b>Full name</b>                                             |
|-------------|--------------------------------------------------------------|
| ABCC9       | ATP-binding cassette, sub-family C (CFTR/MRP), member 9      |
| ABCG5       | ATP-binding cassette, sub-family G (WHITE), member 5         |
| ABCG8       | ATP-binding cassette, sub-family G (WHITE), member 8         |
| ACADVL      | acyl-Coenzyme A dehydrogenase, very long chain               |
| ACTA1       | actin, alpha 1, skeletal muscle                              |
| ACTA2       | actin, alpha 2, smooth muscle, aorta                         |
| ACTC1       | actin, alpha, cardiac muscle 1                               |
| ACTN2       | actinin, alpha 2                                             |
| AGL         | amylo-1, 6-glucosidase, 4-alpha-glucanotransferase           |
| AKAP9       | A kinase (PRKA) anchor protein (yotiao) 9                    |
| ALMS1       | Alstrom syndrome 1                                           |
| ANK2        | ankyrin 2, neuronal                                          |
| ANKRD1      | ankyrin repeat domain 1 (cardiac muscle)                     |
| APOA4       | apolipoprotein A-IV                                          |
| APOA5       | apolipoprotein A-V                                           |
| APOB        | apolipoprotein B (including Ag(x) antigen)                   |
| APOC2       | apolipoprotein C-II                                          |
| APOE        | hypothetical LOC100129500; apolipoprotein E                  |
| ATP5E       | ATP Synthase F1 Subunit Epsilon                              |
| ATG5        | Autophagy Related 5                                          |
| BAG3        | BCL2-associated athanogene 3                                 |
| BECN1       | Beclin 1, Autophagy Related                                  |
| BRAF        | v-raf murine sarcoma viral oncogene homolog B1               |
| CACNA1C     | calcium channel, voltage-dependent, L type, alpha 1C subunit |
| CACNA2D1    | calcium channel, voltage-dependent, alpha 2/delta subunit 1  |
| CACNB2      | calcium channel, voltage-dependent, beta 2 subunit           |
| CALM1       | calmodulin 1 (phosphorylase kinase, delta)                   |
| CALM2       | calmodulin 2 (phosphorylase kinase, delta)                   |
| CALR3       | calreticulin 3                                               |
| CAPN1       | Calpain 1, (Mu/I) Large Subunit                              |

|         |                                                              |
|---------|--------------------------------------------------------------|
| CASQ2   | calsequestrin 2 (cardiac muscle)                             |
| CAV3    | caveolin 3                                                   |
| CBL     | Cas-Br-M (murine) ecotropic retroviral transforming sequence |
| CBS     | cystathionine-beta-synthase                                  |
| CETP    | cholesteryl ester transfer protein, plasma                   |
| COA5    | Cytochrome C Oxidase Assembly Factor 5                       |
| COL3A1  | collagen, type III, alpha 1                                  |
| COL5A1  | collagen, type V, alpha 1                                    |
| COL5A2  | collagen, type V, alpha 2                                    |
| COX15   | COX15 homolog, cytochrome c oxidase assembly protein (yeast) |
| CREB3L3 | cAMP responsive element binding protein 3-like 3             |
| CRELD1  | cysteine-rich with EGF-like domains 1                        |
| CRYAB   | crystallin, alpha B                                          |
| CSRP3   | cysteine and glycine-rich protein 3 (cardiac LIM protein)    |
| CTF1    | cardiotrophin 1                                              |
| CTNNA3  | catenin (cadherin-associated protein), alpha 3               |
| DES     | desmin                                                       |
| DMD     | dystrophin                                                   |
| DMPK    | dystrophia myotonica-protein kinase                          |
| DNAJC19 | DnaJ Heat Shock Protein Family (Hsp40) Member C19            |
| DNM1L   | dynamamin 1-like                                             |
| DOLK    | dolichol kinase                                              |
| DPP6    | dipeptidyl-peptidase 6                                       |
| DSC2    | desmocollin 2                                                |
| DSG2    | desmoglein 2                                                 |
| DSP     | desmoplakin                                                  |
| DTNA    | dystrobrevin, alpha                                          |
| EFEMP2  | EGF-containing fibulin-like extracellular matrix protein 2   |
| ELN     | elastin                                                      |
| EMD     | emerin                                                       |
| EMILIN1 | elastin microfibril interfacier 1                            |
| EYA4    | eyes absent homolog 4 (Drosophila)                           |
| FBN1    | fibrillin 1                                                  |

|          |                                                                                  |
|----------|----------------------------------------------------------------------------------|
| FBN2     | fibrillin 2                                                                      |
| FHL1     | four and a half LIM domains 1                                                    |
| FHL2     | four and a half LIM domains 2                                                    |
| FKRP     | fukutin related protein                                                          |
| FKTN     | fukutin                                                                          |
| FLNA     | filamin A                                                                        |
| FLNC     | filamin C                                                                        |
| FOXE3    | forkhead box E3                                                                  |
| FOXRED1  | FAD-dependent oxidoreductase domain containing 1                                 |
| FXN      | frataxin                                                                         |
| GAA      | glucosidase, alpha; acid                                                         |
| GATAD1   | GATA zinc finger domain containing 1                                             |
| GATA4    | GATA Binding Protein 4                                                           |
| GCKR     | glucokinase (hexokinase 4) regulator                                             |
| GJA1     | gap junction protein alpha 1                                                     |
| GJA5     | gap junction protein, alpha 5, 40kDa                                             |
| GLA      | galactosidase, alpha                                                             |
| GLB1     | galactosidase, beta 1                                                            |
| GPD1L    | glycerol-3-phosphate dehydrogenase 1-like                                        |
| GPIHBP1  | glycosylphosphatidylinositol anchored high density lipoprotein binding protein 1 |
| GUSB     | glucuronidase, beta                                                              |
| HADHA    | hydroxyacyl-Coenzyme A dehydrogenase, alpha subunit                              |
| HCN4     | hyperpolarization activated cyclic nucleotide-gated potassium channel 4          |
| HFE      | hemochromatosis                                                                  |
| HRAS     | v-Ha-ras Harvey rat sarcoma viral oncogene homolog                               |
| HSPA4    | heat shock protein family A (Hsp70) member 4; Heat Shock 70kDa Protein 4         |
| HSPB1    | heat shock protein family B (small) member 1; Heat Shock 27kDa Protein 1         |
| HSPB8    | heat shock 22kDa protein 8                                                       |
| ILK      | integrin-linked kinase                                                           |
| ITGB1BP2 | Integrin Beta 1 Binding Protein (Melusin) 2                                      |
| IRX4     | Iroquois Homeobox Protein 4                                                      |
| JAG1     | jagged 1 (Alagille syndrome)                                                     |
| JPH2     | junctionophilin 2                                                                |

|         |                                                                     |
|---------|---------------------------------------------------------------------|
| JUP     | junction plakoglobin                                                |
| KCNA5   | potassium voltage-gated channel, shaker-related subfamily, member 5 |
| KCND3   | potassium voltage-gated channel, Shal-related subfamily, member 3   |
| KCNE1   | potassium voltage-gated channel, Isk-related family, member 1       |
| KCNE1L  | KCNE1-like                                                          |
| KCNE2   | potassium voltage-gated channel, Isk-related family, member 2       |
| KCNE3   | potassium voltage-gated channel, Isk-related family, member 3       |
| KCNH2   | potassium voltage-gated channel, subfamily H, member 2              |
| KCNJ2   | potassium inwardly-rectifying channel, subfamily J, member 2        |
| KCNJ5   | potassium inwardly-rectifying channel, subfamily J, member 5        |
| KCNJ8   | potassium inwardly-rectifying channel, subfamily J, member 8        |
| KCNQ1   | potassium voltage-gated channel, KQT-like subfamily, member 1       |
| KLF10   | Kruppel-like factor 10                                              |
| KRAS    | v-Ki-ras2 Kirsten rat sarcoma viral oncogene homolog                |
| LAMA2   | laminin, alpha 2                                                    |
| LAMA4   | laminin, alpha 4                                                    |
| LAMP2   | lysosomal-associated membrane protein 2                             |
| LDB3    | LIM domain binding 3                                                |
| LDLR    | low density lipoprotein receptor                                    |
| LDLRAP1 | low density lipoprotein receptor adaptor protein 1                  |
| LMF1    | lipase maturation factor 1                                          |
| LMNA    | lamin A/C                                                           |
| LMOD1   | leiomodrin 1                                                        |
| LOX     | lysyl oxidase                                                       |
| LPL     | lipoprotein lipase                                                  |
| LTBP2   | latent transforming growth factor beta binding protein 2            |
| MAP2K1  | mitogen-activated protein kinase kinase 1                           |
| MAP2K2  | mitogen-activated protein kinase kinase 2 pseudogene                |
| MAT2A   | methionine adenosyltransferase 2A                                   |
| MDM2    | MDM2 Proto-Oncogene, E3 Ubiquitin Protein Ligase                    |
| MED12   | mediator complex subunit 12                                         |
| MFAP5   | microfibrillar associated protein 5                                 |
| MIB1    | mindbomb homolog 1 (Drosophila)                                     |

|         |                                                              |
|---------|--------------------------------------------------------------|
| MRPL3   | mitochondrial ribosomal protein L3                           |
| MURC    | muscle-related coiled-coil protein                           |
| MYBPC3  | myosin binding protein C, cardiac                            |
| MYH11   | myosin, heavy chain 11, smooth muscle                        |
| MYH6    | myosin, heavy chain 6, cardiac muscle, alpha                 |
| MYH7    | myosin, heavy chain 7, cardiac muscle, beta                  |
| MYL2    | myosin, light chain 2, regulatory, cardiac, slow             |
| MYL3    | myosin, light chain 3, alkali; ventricular, skeletal, slow   |
| MYLK    | myosin light chain kinase                                    |
| MYLK2   | myosin light chain kinase 2                                  |
| MYO6    | myosin VI                                                    |
| MYOM1   | myomesin 1, 185kDa                                           |
| MYOZ2   | myozenin 2                                                   |
| MYPN    | myopalladin                                                  |
| NEBL    | nebulette                                                    |
| NEXN    | nexilin (F actin binding protein)                            |
| NKX2-5  | NK2 transcription factor related, locus 5 (Drosophila)       |
| NODAL   | nodal homolog (mouse)                                        |
| NOS1AP  | nitric oxide synthase 1 (neuronal) adaptor protein           |
| NOTCH1  | Notch homolog 1, translocation-associated (Drosophila)       |
| NPPA    | natriuretic peptide precursor A                              |
| NRAS    | neuroblastoma RAS viral (v-ras) oncogene homolog             |
| PCSK9   | proprotein convertase subtilisin/kexin type 9                |
| PDLIM3  | PDZ and LIM domain 3                                         |
| PKP2    | plakophilin 2                                                |
| PLN     | phospholamban                                                |
| PLOD1   | procollagen-lysine,2-oxoglutarate 5-dioxygenase 1            |
| PRDM16  | PR domain containing 16                                      |
| PRKG1   | protein kinase, cGMP-dependent, type I                       |
| PRKAG2  | protein kinase, AMP-activated, gamma 2 non-catalytic subunit |
| PRKAR1A | protein kinase, cAMP-dependent, regulatory, type I, alpha    |
| PSEN1   | presenilin 1                                                 |
| PSEN2   | presenilin 2 (Alzheimer disease 4)                           |

|         |                                                                                             |
|---------|---------------------------------------------------------------------------------------------|
| PTPN11  | protein tyrosine phosphatase, non-receptor type 11                                          |
| RAF1    | v-raf-1 murine leukemia viral oncogene homolog 1                                            |
| RANGRF  | RAN guanine nucleotide release factor                                                       |
| RBM20   | RNA binding motif protein 20                                                                |
| RIT1    | Ras-Like Without CAAX 1                                                                     |
| RRAS    | Related RAS Viral (R-Ras) Oncogene Homolog                                                  |
| RYR1    | ryanodine receptor 1 (skeletal)                                                             |
| RYR2    | ryanodine receptor 2 (cardiac)                                                              |
| SALL4   | Spalt-Like Transcription Factor 4                                                           |
| SCN1B   | sodium channel, voltage-gated, type I, beta                                                 |
| SCN2B   | sodium channel, voltage-gated, type II, beta                                                |
| SCN3B   | sodium channel, voltage-gated, type III, beta                                               |
| SCN4B   | sodium channel, voltage-gated, type IV, beta                                                |
| SCN5A   | sodium channel, voltage-gated, type V, alpha subunit                                        |
| SCN10A  | Sodium Channel, Voltage Gated, Type X Alpha Subunit                                         |
| SCO2    | SCO cytochrome oxidase deficient homolog 2 (yeast)                                          |
| SDHA    | succinate dehydrogenase complex, subunit A, flavoprotein (Fp)                               |
| SEPN1   | selenoprotein N, 1                                                                          |
| SGCB    | sarcoglycan, beta (43kDa dystrophin-associated glycoprotein)                                |
| SGCD    | sarcoglycan, delta (35kDa dystrophin-associated glycoprotein)                               |
| SGCG    | sarcoglycan, gamma (35kDa dystrophin-associated glycoprotein)                               |
| SHOC2   | soc-2 suppressor of clear homolog (C. elegans)                                              |
| SKI     | SKI proto-oncogene                                                                          |
| SLC25A3 | solute carrier family 25 (mitochondrial carrier; phosphate carrier), member 3               |
| SLC25A4 | solute carrier family 25 (mitochondrial carrier; adenine nucleotide translocator), member 4 |
| SLC2A10 | solute carrier family 2 (facilitated glucose transporter), member 10                        |
| SLMAP   | sarcolemma associated protein                                                               |
| SMAD2   | SMAD family member 2                                                                        |
| SMAD3   | SMAD family member 3                                                                        |
| SMAD4   | SMAD family member 4                                                                        |
| SNTA1   | syntrophin, alpha 1 (dystrophin-associated protein A1, 59kDa, acidic component)             |
| SOS1    | son of sevenless homolog 1 (Drosophila)                                                     |
| SOS2    | SOS Ras/Rho guanine nucleotide exchange factor 2                                            |

|        |                                                                    |
|--------|--------------------------------------------------------------------|
| SPRED1 | sprouty-related, EVH1 domain containing 1                          |
| STUB1  | STIP1 Homology And U-Box Containing Protein 1, E3 Ubiquitin        |
| SYNE1  | spectrin repeat containing, nuclear envelope 1                     |
| SYNE2  | spectrin repeat containing, nuclear envelope 2                     |
| TAZ    | tafazzin                                                           |
| TBX20  | T-box 20                                                           |
| TBX3   | T-box 3                                                            |
| TBX5   | T-box 5                                                            |
| TCAP   | titin-cap (telethonin)                                             |
| TGFB2  | transforming growth factor, beta 2                                 |
| TGFB3  | transforming growth factor, beta 3                                 |
| TGFBR1 | transforming growth factor, beta receptor 1                        |
| TGFBR2 | transforming growth factor, beta receptor II (70/80kDa)            |
| TMEM43 | transmembrane protein 43                                           |
| TMEM70 | transmembrane protein 70                                           |
| TMPO   | thymopoietin                                                       |
| TNNC1  | troponin C type 1 (slow)                                           |
| TNNI3  | troponin I type 3 (cardiac)                                        |
| TNNT2  | troponin T type 2 (cardiac)                                        |
| TPM1   | tropomyosin 1 (alpha)                                              |
| TRDN   | triadin                                                            |
| TRIM54 | Tripartite Motif Containing 54                                     |
| TRIM63 | tripartite motif-containing 63                                     |
| TRPM4  | transient receptor potential cation channel, subfamily M, member 4 |
| TSFM   | Ts translation elongation factor, mitochondrial                    |
| TTN    | titin                                                              |
| TTR    | transthyretin                                                      |
| TXNRD2 | thioredoxin reductase 2                                            |
| UBE4B  | Ubiquitination Factor E4B                                          |
| UNC45B | Unc-45 Myosin Chaperone B                                          |
| VCL    | vinculin                                                           |
| XK     | X-linked Kx blood group (McLeod syndrome)                          |
| ZBTB17 | zinc finger and BTB domain containing 17                           |

|       |                                                      |
|-------|------------------------------------------------------|
| ZFPM2 | Zinc Finger Protein, FOG Family Member 2             |
| ZHX3  | zinc fingers and homeoboxes 3                        |
| ZIC3  | Zic family member 3 (odd-paired homolog, Drosophila) |
