# Supplementary material for: The utility of the Mayo Score for predicting the yield of genetic testing in patients with hypertrophic cardiomyopathy
Source: PubMed Central journal article supplement — Arch Med Sci. 2018 Oct 8;15(3):641–9. doi: 10.5114/aoms.2018.78767 (PMC6524174; doi:10.5114/aoms.2018.78767), 2018-10-08
Supplement: AMS-15-33903-S3.pdf [file AMS-15-33903-S3.pdf]

**Supplemental Table SIII.** Compound heterozygotes and complex genotypes, ACMG class 3 to 5.

**Compound heterozygotes**

| Patient | Nucleotide change, protein variant              | ACMG | Nucleotide change, protein variant2    | ACMG |
|---------|-------------------------------------------------|------|----------------------------------------|------|
| R.D.    | <i>MYH7</i> c.2389G>A p.(Ala797Thr)             | 5    | <i>MYH7</i> c.161G>A p.(Arg54Gln)      | 3    |
|         | <i>DSP</i> c.8068C>A p.(Pro2690Thr)             | 3    | <i>SCN2B</i> c.53G>A p.Ser18Asn        | 3    |
| P.S.    | <i>MYBPC3</i> c.2639_2642dup, p.(Ser882Argfs*3) | 5    | <i>MYBPC3</i> c.1468G>A, p.(Gly490Arg) | 3    |
| J.Š.    | <i>MYBPC3</i> c.696del, p.(Phe233Serfs*67)      | 5    | <i>MYBPC3</i> c.2381C>T, p.(Pro794Leu) | 3    |

**Complex genotypes**

| Patient | Nucleotide change, protein variant         | ACMG | Nucleotide change, protein variant2     | ACMG           |
|---------|--------------------------------------------|------|-----------------------------------------|----------------|
| R.D.    | <i>MYH7</i> c.2389G>A p.(Ala797Thr)        | 5    | <i>MYH7</i> c.161G>A p.(Arg54Gln)       | 3              |
|         | <i>DSP</i> c.8068C>A p.(Pro2690Thr)        | 3    | <i>SCN2B</i> c.53G>A p.Ser18Asn         | 3              |
| J.N.    | <i>MYBPC3</i> c.3166dup p.(Ala1056Glyfs*9) | 5    | <i>MYH7</i> c.5527A>G p.(Ser1843Gly)    | 3              |
|         | <i>ACTN2</i> c.1549C>T p.(Leu517Phe)       | 3    |                                         |                |
| A.P.    | <i>MYL2</i> c.401A>C p.(Glu134Ala)         | 3    | <i>MYH7</i> c.1868A>G p.(Asn623Ser)     | 3              |
|         | <i>CAV3</i> c.89A>G p.(Lys30Arg)           | 3    |                                         |                |
| M.Ž.    | <i>MYBPC3</i> c.3697C>T, p.(Gln1233*)      | 5    | <i>MYH7</i> c.2039C>T p.(Ser680Phe)     | 3              |
|         | <i>DSP</i> c.242G>A p.(Cys81Tyr)           | 3    |                                         |                |
| V.N.    | <i>MYBPC3</i> c.2215G>T p.(Glu739*)        | 5    | <i>TNNC1</i> c.435C>A p.(Asp145Glu)     | 3              |
|         | <i>PKP2</i> c.1170+4_1170+7dup             | 3    |                                         |                |
| J.J.    | <i>MIB1</i> c.1111C>T p.(Arg371*)          | 3    | <i>MYL2</i> c.496G>A p.(Asp166Asn)      | 3              |
|         | <i>RYR2</i> c.10640C>T p.(Thr3547Met)      | 3    |                                         |                |
| P.V.    | <i>RAF1</i> c.781C>T, p.(Pro621Ser)        | 5    | <i>MYBPC3</i> c.3343G>A, p.(Val1115Ile) | 3              |
|         | <i>SOS1</i> c.233T>G, p.(Phe78Cys)         | 3    |                                         |                |
| M.K.    | <i>MYBPC3</i> c.3697C>T, p.(Gln1233*)      | 5    | <i>MYOZ2</i> c.343C>T, p.(Arg115*)      | 3              |
| J.P.    | <i>TNNT2</i> c.824G>A p.(Arg275Gln)        | 3    | <i>SCN5A</i> c.4895G>A p.(Arg1632His)   | 4 <sup>¶</sup> |
| E.K.    | <i>MYH7</i> c.2167C>G p.(Arg723Gly)        | 5    | <i>ELN</i> c.1408C>T p.(Gln470*)        | 4              |
| R.V.    | <i>MYH7</i> c.5561C>T, p.(Thr1854Met)      | 3    | <i>TNNI3</i> c.497C>T, p.(Ser166Phe)    | 4              |
| E.K.    | <i>MYH7</i> c.2770G>A p.(Glu924Lys)        | 5    | <i>CRYAB</i> c.116C>T p.(Pro39Leu)      | 3              |
| M.L.    | <i>TRIM63</i> c.831+2T>G                   | 3    | <i>TRIM63</i> p.Gln247Ter               | 3              |
| R.Š.    | <i>MYBPC3</i> c.3490+1G>T                  | 5    | <i>ACTN2</i> c.2147C>T, p.(Thr716Met)   | 3              |
| P.T.    | <i>MYBPC3</i> c.442G>A p.(Gly148Arg)       | 3    | <i>ACTN2</i> c.1552C>T p.(His518Tyr)    | 3              |

|      |                                             |   |                                         |   |
|------|---------------------------------------------|---|-----------------------------------------|---|
| R.Š. | <i>MYBPC3</i> c.3490+1G>T                   | 5 | <i>ACTN2</i> c.2147C>T, p.(Thr716Met)   | 3 |
| V.F. | <i>MYOM1</i> c.1482T>G p.(Ser494Arg)        | 3 | <i>BAG3</i> c.1523A>G p.(Tyr508Cys)     | 3 |
| J.B. | <i>SCN2B</i> c.332C>T, p.(Ser111Leu)        | 3 | <i>CACNA1C</i> c.5693+2T>A              | 3 |
| I.Š. | <i>MYH7</i> c.2546T>C p.(Met849Thr)         | 4 | <i>DSC2</i> c.1223C>T p.(Thr408Ile)     | 3 |
| V.B. | <i>MYH7</i> c.2882T>G, p.(Leu961Arg)        | 3 | <i>DSG2</i> c.216G>T, p.(Lys72Asn)      | 3 |
| J.M. | <i>NEXN</i> c.1190G>A, p.(Arg397Gln)        | 3 | <i>DSP</i> c.2684A>G, p.(Tyr895Cys)     | 3 |
| Z.M. | <i>MYH7</i> c.2347C>T, p.(Arg783Cys)        | 3 | <i>DSP</i> c.4961T>C, p.(Leu1654Pro)    | 3 |
| L.H. | <i>MYBPC3</i> c.3580dup p.(Ala1194Glyfs*14) | 5 | <i>FHL2</i> c.467A>T p.(Lys156Ile)      | 3 |
| J.N. | <i>DSP</i> c.3616T>A p.(Leu1206Ile)         | 3 | <i>FLNC</i> c.4660A>C p.(Ile1554Leu)    | 3 |
| S.V. | <i>MYH6</i> c.3607dup p.(Ala1203Glyfs*30)   | 3 | <i>MIB1</i> c.1971del p.(Asn658Thrfs*7) | 3 |
| I.L. | <i>FHL2</i> c.501+1G>T                      | 3 | <i>MYBPC3</i> c.1736A>C p.(Lys579Thr)   | 3 |
| P.V. | <i>RAF1</i> c.781C>T, p.(Pro621Ser)         | 5 | <i>MYBPC3</i> c.3343G>A, p.(Val1115Ile) | 3 |
| A.H. | <i>MYH7</i> c.497T>G p.(Leu166Glu)          | 3 | <i>MYBPC3</i> c.62T>G p.(Val21Gly)      | 3 |
| L.J. | <i>MYBPC3</i> c.1468G>A p.(Gly490Arg)       | 3 | <i>MYH6</i> c.3346C>A p.(Arg1116Ser)    | 3 |
| J.N. | <i>MYBPC3</i> c.3166dup p.(Ala1056Glyfs*9)  | 5 | <i>MYH7</i> c.5527A>G p.(Ser1843Gly)    | 3 |
| J.J. | <i>MIB1</i> c.1111C>T p.(Arg371*)           | 3 | <i>MYL2</i> c.496G>A p.(Asp166Asn)      | 3 |
| N.S. | <i>MYBPC3</i> c.1000G>A p.(Glu334Lys)       | 3 | <i>MYOM1</i> c.1175-2A>T                | 3 |
| L.F. | <i>MYBPC3</i> c.772+1G>A                    | 5 | <i>PRDM16</i> c.1484C>T p.(Pro495Leu)   | 3 |
| P.M. | <i>MYH7</i> c.2207T>C p.(Ile736Thr)         | 5 | <i>PRKAG2</i> c.997T>G p.(Ser333Ala)    | 3 |
| P.P. | <i>MYH7</i> c.428G>A p.(Arg143Gln)          | 4 | <i>SCN10A</i> c.3803G>A, p.(Arg1268Gln) | 3 |
| J.S. | <i>MYBPC3</i> c.1790G>A p.(Arg597Gln)       | 3 | <i>SCN5A</i> c.1199G>A p.(Gly400Glu)    | 3 |
| L.P. | <i>MYH7</i> c.2333A>T p.(Asp778Val)         | 4 | <i>SCN5A</i> c.615T>A p.(Tyr205Ter)     | 3 |
| V.N. | <i>MYBPC3</i> c.2215G>T p.(Glu739*)         | 5 | <i>TNNC1</i> c.435C>A p.(Asp145Glu)     | 3 |

\*Class 4 is for sick sinus syndrome, not hypertrophic cardiomyopathy.
